# Supplementary material for: Comparative Study of Natural Antioxidants from Glycine max, Anethum graveolensand Pimpinella anisum Seed and Sprout Extracts Obtained by Ultrasound-Assisted Extraction
Source: MDPI journal article supplement (doi:10.3390/separations9060152), 2022-06-13
Supplement: s1 [file s1]

# Supplementary Materials: Comparative Study of Natural Antioxidants from *Glycine Max*, *Anethum Graveolens* and *Pimpinella Anisum* Seeds and Sprouts Extracts Obtained by Ultrasound-Assisted Extraction

Fanica Balanescu<sup>1,2</sup>, Anna Cazanevscaia Busuioc<sup>1,\*</sup>, Andreea Veronica Dedi Botezatu<sup>1</sup>, Steluta Gosav<sup>1</sup>, Sorin Marius Avramescu<sup>3,4</sup>, Bianca Furdul<sup>1\*</sup> and Rodica Mihaela Dinica<sup>1\*</sup>

<sup>1</sup> Department of Chemistry, Physics and Environment, “Dunărea de Jos” University of Galati, 111 Domnească Street, 800201 Galati, Romania; email: [anna.cazanevscaia@ugal.ro](mailto:anna.cazanevscaia@ugal.ro) (A.C.B.); [andreea.botezatu@ugal.ro](mailto:andreea.botezatu@ugal.ro) (A.V.D.B.); [rodica.dinica@ugal.ro](mailto:rodica.dinica@ugal.ro) (R.M.D.); [bfurdui@ugal.ro](mailto:bfurdui@ugal.ro) (B.F.); [steluta.gosav@ugal.ro](mailto:steluta.gosav@ugal.ro) (S.G.)

<sup>2</sup> Faculty of Medicine and Pharmacy, “Dunărea de Jos” University of Galati, 35 Al. I. Cuza Street, 800010 Galati, Romania; [fanica.balanescu@ugal.ro](mailto:fanica.balanescu@ugal.ro) (F.B.)

<sup>3</sup> Faculty of Chemistry, Department of Organic Chemistry, Biochemistry and Catalysis, University of Bucharest, 90-92 Panduri Street, 050663, Bucharest, Romania. [sorin\\_avramescu@yahoo.com](mailto:sorin_avramescu@yahoo.com) (S.M.A.);

<sup>4</sup> Research Center for Environmental Protection and Waste Management, University of Bucharest, 91-95 Splaiul Independentei, 050095, Bucharest, Romania;

\* Correspondence: [rodica.dinica@ugal.ro](mailto:rodica.dinica@ugal.ro) (R.M.D.); [bfurdui@ugal.ro](mailto:bfurdui@ugal.ro) (B.F.); [anna.cazanevscaia@ugal.ro](mailto:anna.cazanevscaia@ugal.ro) (A.C.B.)

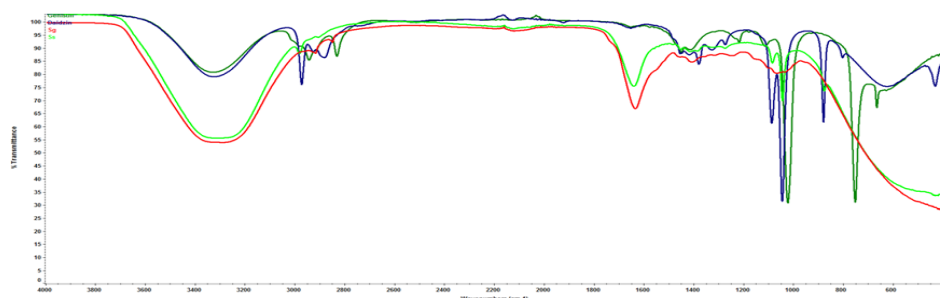

a)

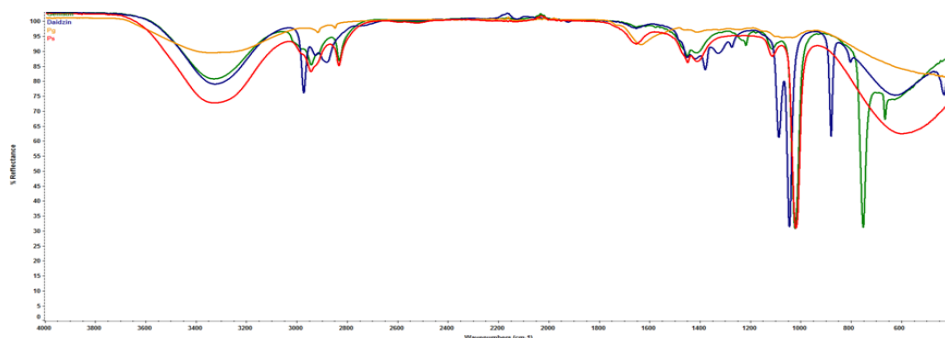

b)

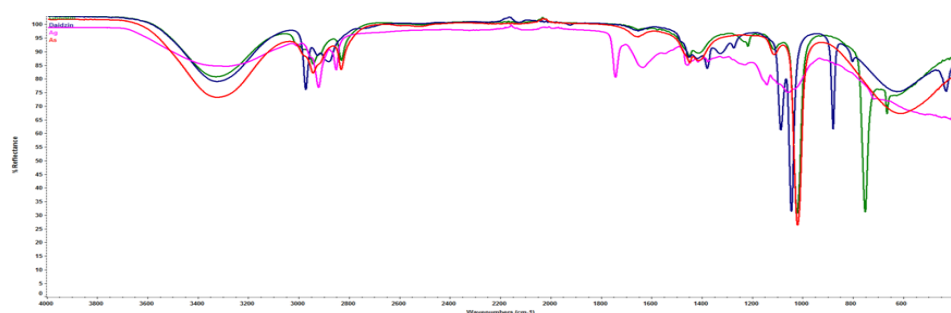

c)

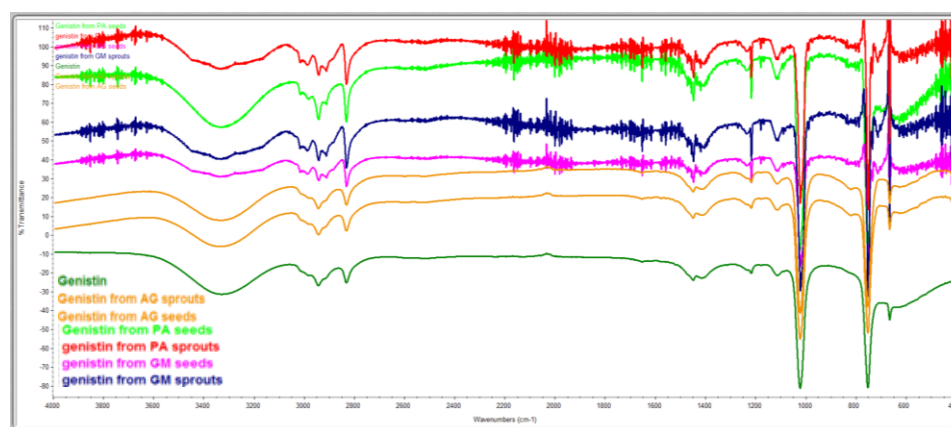

d)

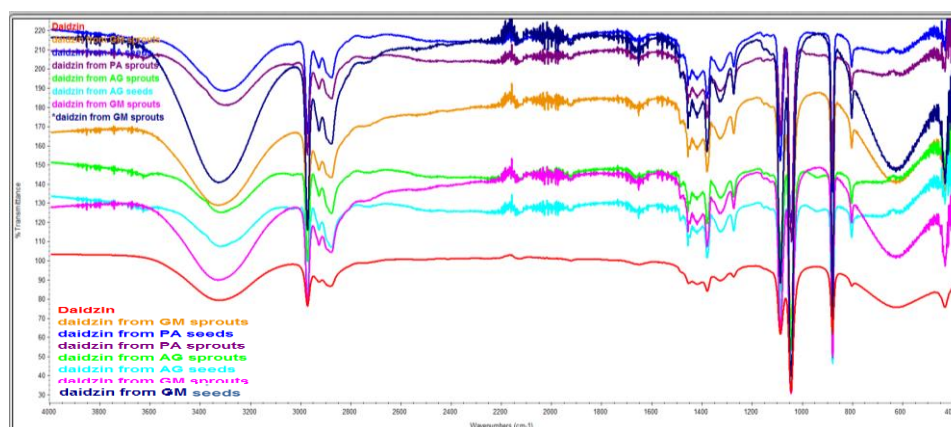

**Figure S1.** Overlaid FTIR spectra for pure daidzein (D) and genistein (G) and the analyzed samples: a) seeds and sprouts of *G. max* (GMsd, GMsp); b) seeds and sprouts of *P. anisum* (PAsd,PAsp); c) seeds and sprouts of *A. graveolens* ( AGsd, AGsp); d) genistein and e) daidzein FTIR analysis for the pure compounds (Sigma Aldrich) and for the compounds isolated through PTLC.
